# Supplementary material for: Effect of TNFα stimulation on expression of kidney risk inflammatory proteins in human umbilical vein endothelial cells cultured in hyperglycemia
Source: PubMed Central journal article supplement (PMC8160214; doi:10.1038/s41598-021-90496-w), 2021-05-27
Supplement: 41598_2021_90496_MOESM1_ESM.pdf [file 41598_2021_90496_MOESM1_ESM.pdf]

*Supplementary Information*

**Effect of TNF $\alpha$  Stimulation on Expression of Kidney Risk**

**Inflammatory Proteins in Human Umbilical Vein Endothelial Cells**

**Cultured in Hyperglycemia**

Zaipul I. Md Dom<sup>1,2</sup>, Caterina Pipino<sup>1,2,3</sup>, Bozena Krolewski<sup>1,2</sup>, Kristina O'Neil<sup>1</sup>, Eiichiro

Satake<sup>1,2</sup> and Andrzej S. Krolewski<sup>1,2,\*</sup>

<sup>1</sup>Research Division, Joslin Diabetes Center, Boston, MA, USA; <sup>2</sup>Department of Medicine, Harvard Medical School, Boston, MA, USA; <sup>3</sup>Department of Medical, Oral and Biotechnological Sciences, Center for Advanced Studies and Technology, University G. d'Annunzio of Chieti-Pescara, Chieti, Italy

**Table S1.** List of the 17 circulating KRIS proteins associated with risk of development of ESKD and their corresponding extracellular and intracellular protein levels in HUVECs following TNF $\alpha$  treatment in hyperglycemia condition. TNF $\alpha$ , tumor necrosis factor alpha; TNF-RSF, tumor necrosis factor receptor superfamily. Data presented as mean relative fluorescence unit (RFU).

| Protein Name                                          | Gene Symbol | Intracellular                | Extracellular                |
|-------------------------------------------------------|-------------|------------------------------|------------------------------|
|                                                       |             | Hyperglycemia + TNF $\alpha$ | Hyperglycemia + TNF $\alpha$ |
| <i><b>TNF-RSF Members</b></i>                         |             |                              |                              |
| Tumor necrosis factor receptor superfamily member 1A  | TNFR1       | 1133.48                      | 823.03                       |
| Tumor necrosis factor receptor superfamily member 1B  | TNFR2       | 9318.73                      | 2200.81                      |
| Tumor necrosis factor receptor superfamily member 21  | TNFRSF21    | 1259.75                      | 8111.74                      |
| Tumor necrosis factor receptor superfamily member 19  | TNFRSF19    | 262.99                       | 130.16                       |
| Tumor necrosis factor receptor superfamily member 27  | EDA2R       | 3741.12                      | 689.33                       |
| Tumor necrosis factor receptor superfamily member 19L | RELT        | 643.93                       | 381.77                       |
| <i><b>Other Proteins</b></i>                          |             |                              |                              |
| Interleukin-15 receptor subunit alpha                 | IL15RA      | 1841.55                      | 357.48                       |
| Interleukin-17F                                       | IL17F       | 821.99                       | 197.67                       |
| Complement decay-accelerating factor                  | CD55        | 9842.67                      | 3003.05                      |
| CMRF35-like molecule 6                                | CD300C      | 990.71                       | 397.20                       |
| Tumor necrosis factor ligand superfamily member 15    | TNFSF15     | 927.94                       | 8209.81                      |
| C-C motif chemokine 14                                | CCL14       | 100.20                       | 146.43                       |
| C-C motif chemokine 15                                | CCL15       | 1685.95                      | 257.69                       |
| Macrophage colony-stimulating factor 1                | CSF1        | 7576.03                      | 2134.95                      |
| Hepatitis A virus cellular receptor 2                 | HAVCR2      | 1106.82                      | 275.30                       |
| Interleukin-1 receptor type 1                         | IL1R1       | 191.54                       | 69.87                        |
| Interleukin-18 receptor 1                             | IL18R1      | 8196.60                      | 1205.96                      |

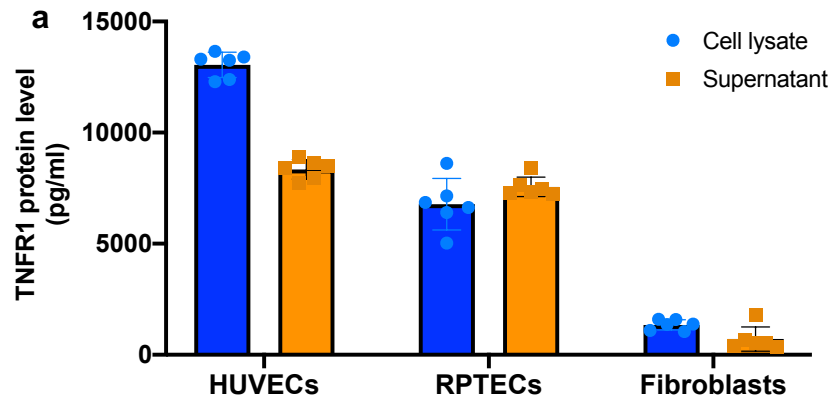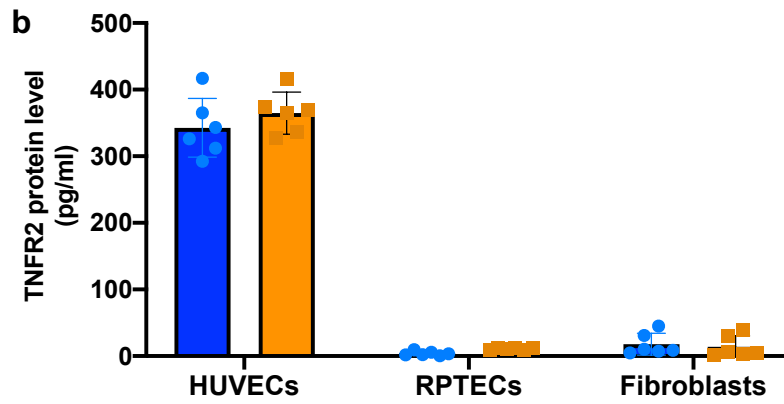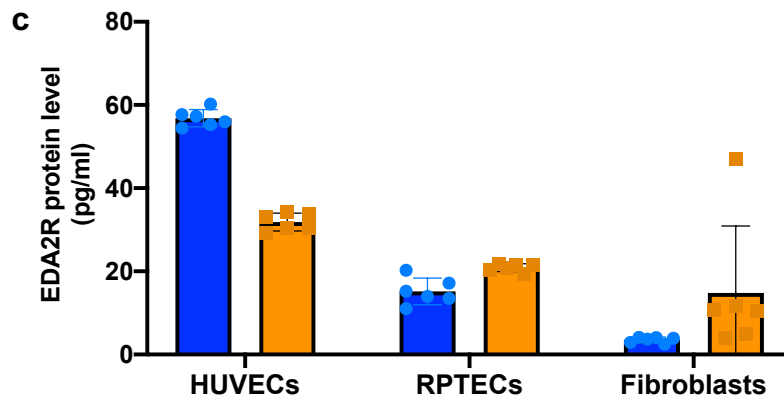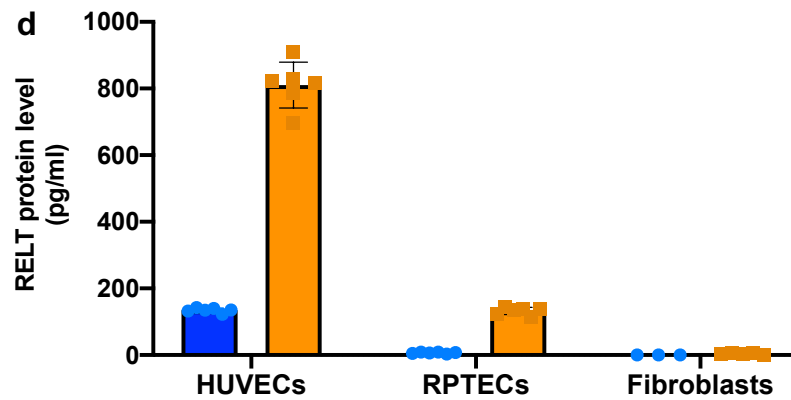

**Figure S1.** Expression protein levels (pg/ml) of select KRIS proteins, **(A)** TNFR1, **(B)** TNFR2, **(C)** EDA2R and **(D)** RELT in 3 human cell lines (HUVECs, Renal Proximal Tubule Epithelial Cells (RPTECs) and Fibroblasts) measured using the custom-made Olink platform.

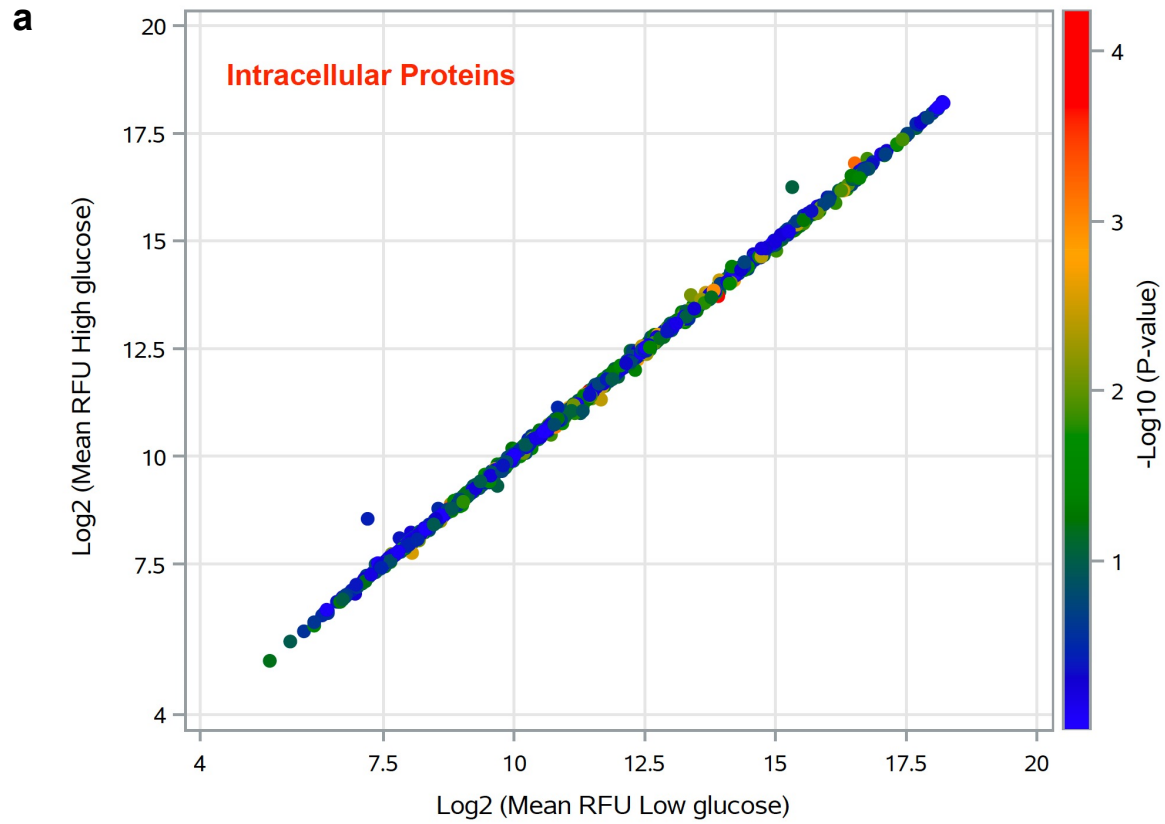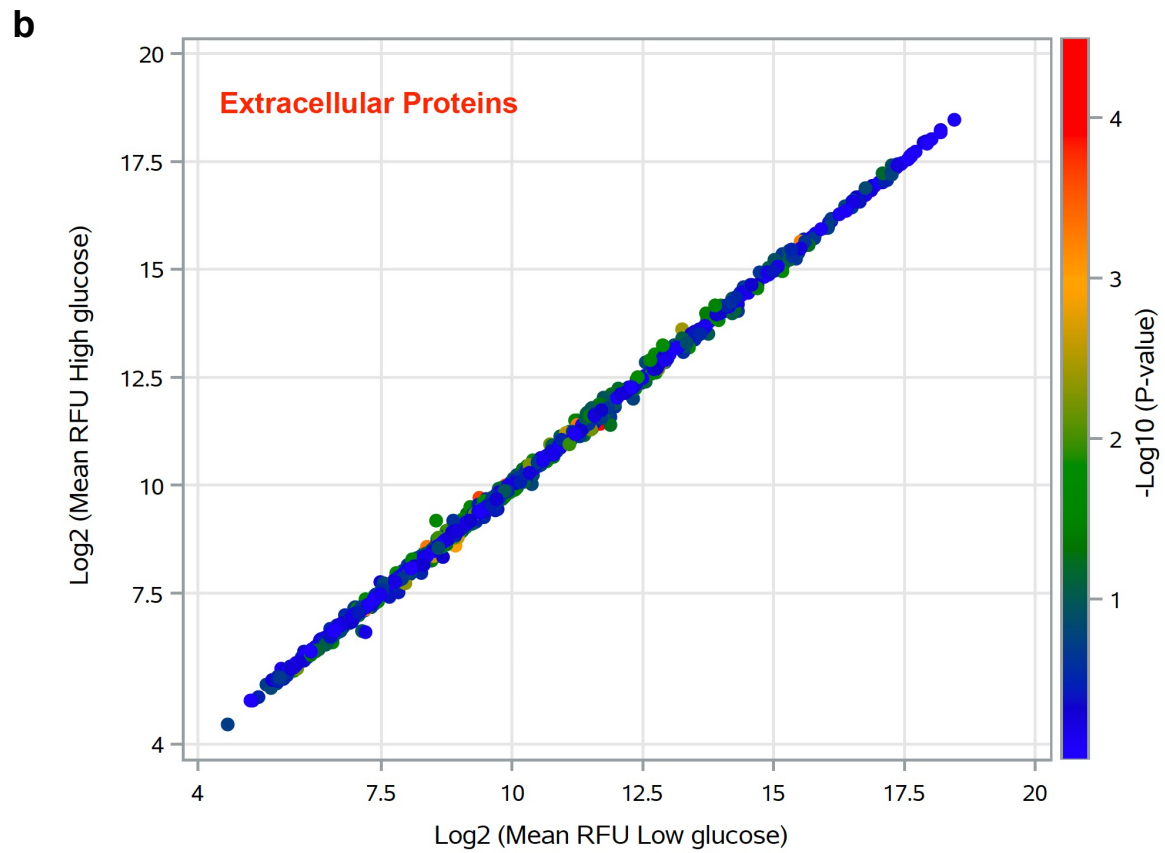

**Figure S2.** Scatterplots comparing (A) intracellular and (B) extracellular protein expression profiles in HUVECs exposed to high glucose (4.5 g/L) vs. low glucose (1.0 g/L) alone. The values plotted are the mean RFU values ( $\log_2$  scaled for 3 replicates) for the high glucose ( $y$  axis) and the low glucose ( $x$  axis) groups. The color of each point indicates the P-values intensity ( $-\log_{10}$  scaled) from not significant (blue) to highly significant (red).
